# Supplementary material for: Novel ionic surface imprinting technology: design and application for selectively recognizing heavy metal ions
Source: Royal Society of Chemistry journal article supplement (doi:10.1039/c8ra09948k), 2019-01-01
Supplement: c8ra09948k1.pdf [file c8ra09948k1.pdf]

## Supplementary Materials

### Figure Caption

Fig.1S The schematic diagram of “pre-grafting polymerization and post-crosslinking/imprinting”  
method

Fig.2S The schematic diagram of “grafting polymerization synchronized with crosslinking/  
imprinting” method

Fig.3S The SEM images of D301 (a and b) and Cd-SIP (c and d)

Fig.4S The particle distribution curves of D301 and Cd-SIP

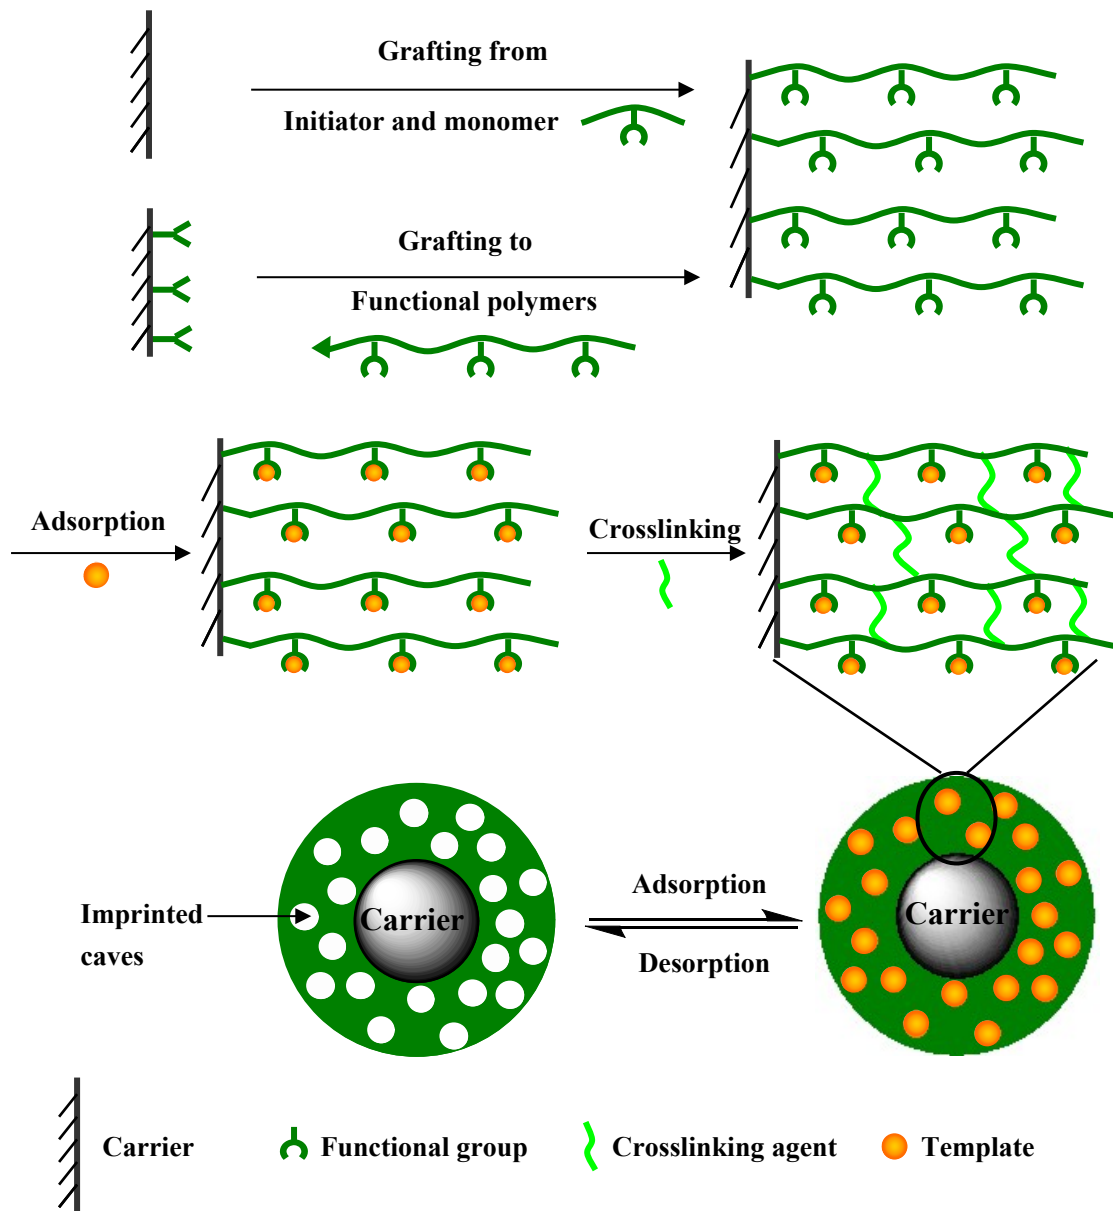

Fig.1S

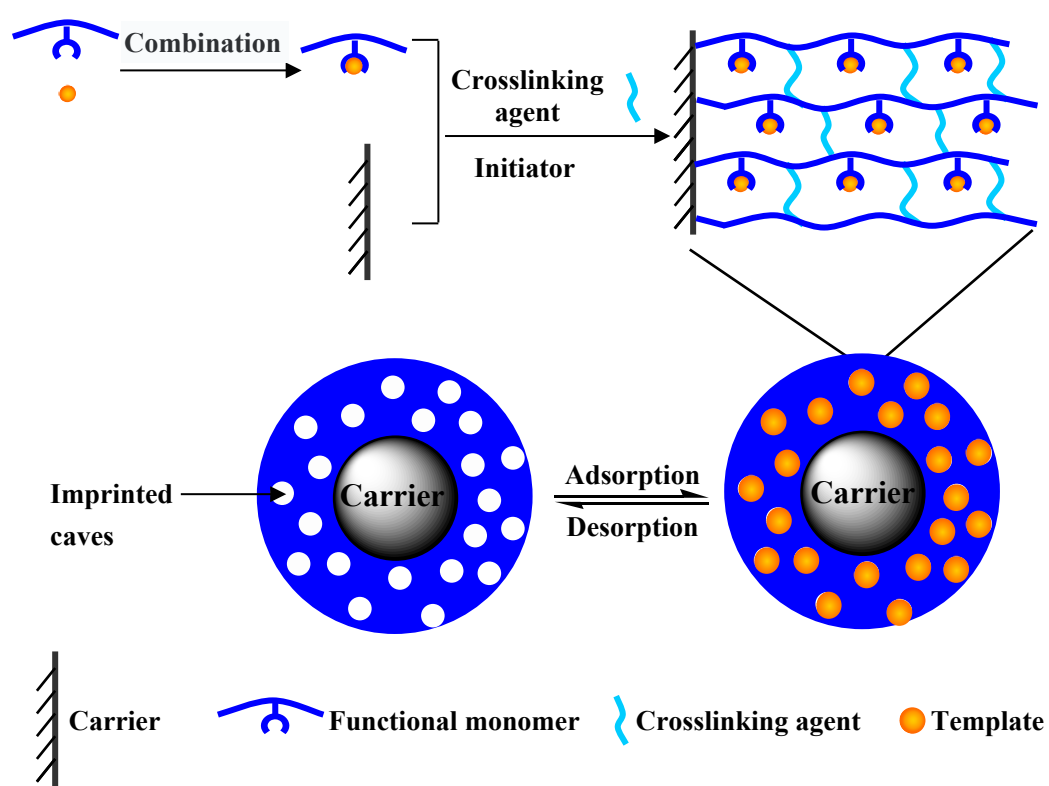

Fig.2S

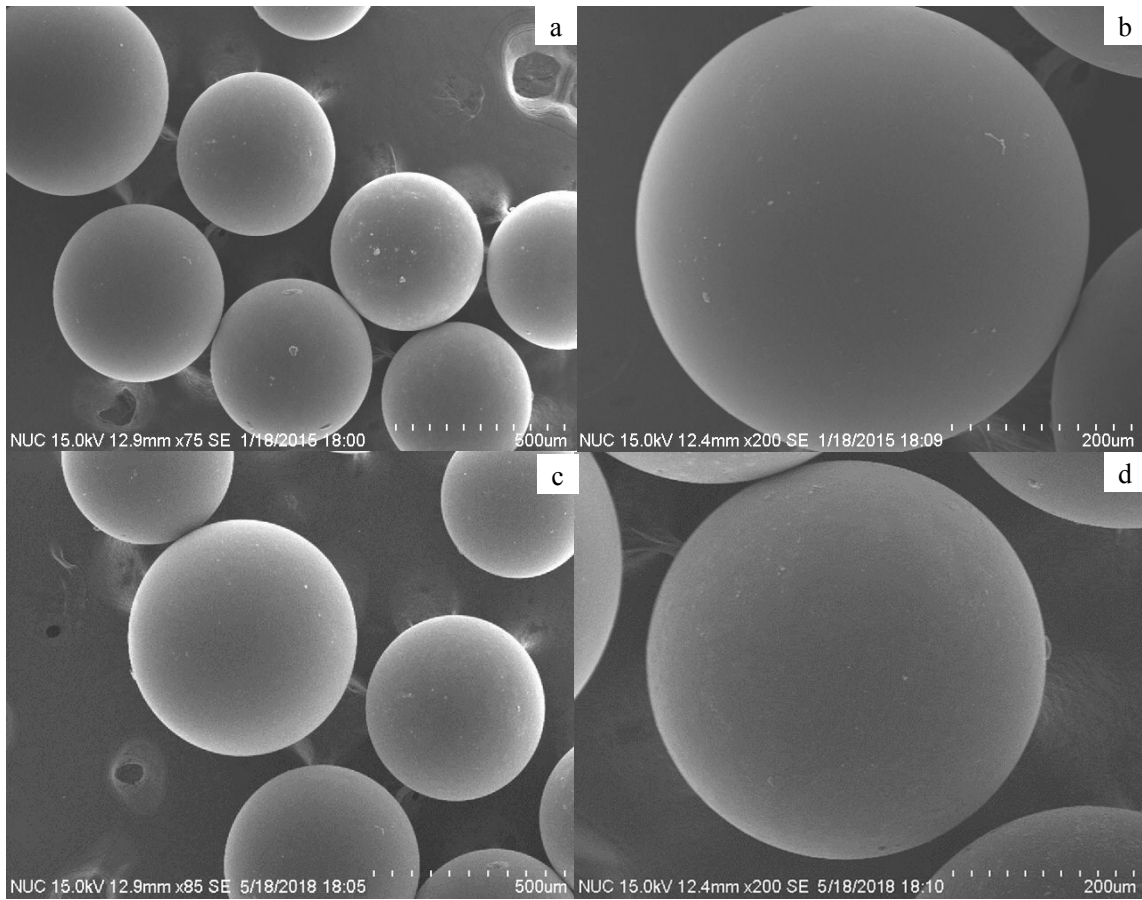

**Fig.3S**

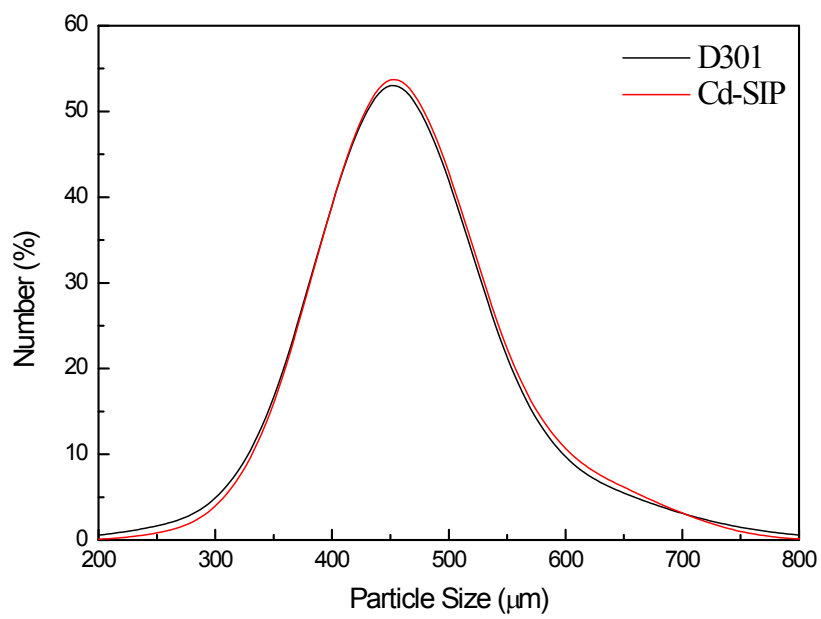

**Fig.4S**
